# Supplementary material for: Exploring the potential of deep-blue autofluorescence for monitoring amyloid fibril formation and dissociation
Source: PeerJ. 2019 Aug 16;7:e7554. doi: 10.7717/peerj.7554 (PMC6699583; doi:10.7717/peerj.7554)
Supplement: Raw DataS1 [file peerj-07-7554-s008.xlsx]

## Sheet: Sheet1
Insulin ThT assay					Insulin light scattering assay					Insulin dbAF assay						Lysozyme ThT assay					Lysozyme light scattering assay					Lysozyme dbAF assay						Prion protein ThT assay					Prion protein light scattering assay					Prion protein dbAF assay
Time	Repeat1	Repeat2	Repeat3		Time	Repeat1	Repeat2	Repeat3		Time	Repeat1	Repeat2	Repeat3			Time	Repeat1	Repeat2	Repeat3		Time	Repeat1	Repeat2	Repeat3		Time	Repeat1	Repeat2	Repeat3			Time	Repeat1	Repeat2	Repeat3		Time	Repeat1	Repeat2	Repeat3		Time	Repeat1	Repeat2	Repeat3
0	0.20905	0.17533	0.20103		0	0.9525	1.55291	3.28163		0	8.83704	10.4165	6.4172			0	2.36949	2.34415	2.30247		0	7.53054	7.4206	7.47443		0	11.8023	11.2195	15.7818			0	22.232	21.5289	21.895		0	28.4775	20.5028	17.5039		0	65.3011	70.9396	65.8941
1	0.17105	0.19608	0.20233		1	2.70374	2.46846	2.29827		1	6.63163	8.16018	12.8393			1	2.4984	2.80544	2.77442		1	21.9207	12.4985	11.31		1	13.3424	13.2155	13.7626			1	22.8723	23.5037	23.6997		1	38.658	34.6956	25.3659		1	84.575	90.3041	85.5453
2	0.19709	0.19313	0.24064		2	3.92405	2.37487	5.00334		2	6.74469	9.12466	10.65			2	5.55251	6.73802	6.94956		2	18.5452	18.1883	15.6354		2	15.3882	14.8611	15.8914			2	25.8635	27.3734	26.4066		2	37.2767	34.1412	34.0758		2	118.886	84.6864	80.5656
3	0.26987	0.30175	0.29229		3	8.04981	4.10882	4.71046		3	10.0532	14.6185	6.68666			3	9.22051	10.7182	10.9518		3	20.1174	18.6193	18.0591		3	15.946	15.305	17.1939			3	29.4655	31.2935	29.0707		3	37.4454	34.3029	33.7699		3	90.9637	90.069	83.6578
4	0.347	0.54269	0.45752		4	11.3413	4.26568	5.16115		4	9.20665	9.1669	9.34129			4	12.1139	13.3383	13.7347		4	21.1271	18.2829	19.768		4	16.5971	18.8103	22.4977			4	33.4414	34.7398	31.8776		4	34.6115	35.4984	32.9604		4	96.7902	92.063	101.49
5	0.57942	0.92652	0.78003		5	7.15804	4.80696	6.09092		5	16.0541	9.38659	8.57489			5	14.0662	15.3168	15.6016		5	20.9391	18.4282	19.2951		5	16.1655	16.0672	18.5246			5	34.7242	37.1477	34.315		5	37.3883	36.3398	33.2556		5	94.889	90.9843	97.5156
6	1.08021	1.65962	1.23381		6	4.77635	5.55722	7.11409		6	8.75524	9.41186	9.04426			6	15.823	17.1354	17.6321		6	21.7114	18.4509	19.0013		6	16.2784	16.8169	17.9686			6	36.9427	39.9611	36.6286		6	36.2018	36.3196	35.9407		6	99.3774	88.6645	97.2649
7	1.76853	2.54157	1.91884		7	7.16791	8.27141	6.5031		7	12.2018	11.9102	15.1462			7	17.4576	18.2304	18.8652		7	20.5178	20.2546	21.8733		7	16.4359	17.7335	17.5911			7	39.3182	42.7153	38.2026		7	35.6981	34.2757	36.7433		7	91.5223	92.8628	101.491
8	2.84974	3.54706	2.94894		8	8.05008	10.3593	7.46808		8	14.1895	14.9217	14.2104			8	18.4189	19.9359	22.3073		8	21.96	21.7522	21.1208		8	17.7504	17.9242	17.9747			8	40.7627	43.5913	39.37		8	35.5985	34.3769	36.8444		8	95.5043	90.7333	95.1533
9	4.27011	4.95454	4.16582		9	12.0499	18.0678	10.6028		9	15.7684	19.6821	12.6463			9	21.4882	21.552	22.8306		9	23.2806	25.5331	21.2071		9	17.5897	19.191	21.4434			9	43.199	46.0163	41.293		9	37.2278	36.1379	37.5375		9	94.1953	100.225	94.5185
10	6.22619	6.81121	5.6851		10	12.6453	19.4403	12.5287		10	17.2136	24.2063	16.0974			10	21.2149	24.752	23.8272		10	24.9418	24.5462	23.7885		10	18.5229	20.1191	17.601			10	44.0166	47.4363	42.847		10	35.2366	34.969	35.1537		10	105.724	91.2428	99.3268
11	8.15648	9.01188	7.54214		11	20.2612	26.202	16.76		11	20.2838	35.312	21.3474			11	24.2758	22.3133	31.0678		11	23.4772	27.9206	25.2203		11	20.0646	20.5164	19.6334			11	44.5602	48.5581	43.8709		11	36.525	35.2576	36.6027		11	99.8736	91.2007	100.935
12	10.6392	11.9432	9.60462		12	21.9031	30.2728	22.3309		12	23.5031	35.386	25.1937			12	22.9199	25.8008	27.3741		12	26.7485	29.5318	25.1104		12	20.1078	21.9837	19.536			12	47.0156	49.9272	45.2108		12	35.0395	35.5983	37.5885		12	95.4721	91.4663	97.0958
13	13.4631	14.5564	11.6209		13	28.7991	39.6681	28.4596		13	26.4306	48.1677	30.253			13	25.5292	26.9675	26.2722		13	27.1154	30.9182	29.705		13	21.5246	22.4351	19.4613			13	49.5184	52.2498	46.5312		13	37.4603	36.2216	36.347		13	95.6077	91.084	96.0144
14	16.0638	17.6585	14.2677		14	35.6931	44.5335	35.4243		14	29.5556	73.8637	33.7451			14	28.1824	28.7675	31.3404		14	23.0357	32.6732	24.5175		14	21.0246	24.3357	22.6367			14	49.7545	53.5655	48.191		14	35.9848	35.3649	37.5268		14	95.9499	91.6365	98.8973
15	21.7085	21.812	17.1518		15	42.9583	99.7413	45.2692		15	38.1982	93.7271	40.4638			15	27.3033	31.0313	31.3068		15	30.2048	36.7976	32.6005		15	23.2894	22.2016	20.1194			15	50.3251	54.2159	49.349		15	37.1404	37.1204	37.7537		15	99.9059	95.712	97.1037
16	30.1356	30.1077	20.2309		16	59.8334	201.665	61.4001		16	45.5188	119.602	56.9041			16	29.285	34.9259	34.4308		16	29.9445	34.3522	27.5782		16	23.674	23.2398	21.7714			16	51.1416	55.5772	50.9514		16	36.7642	36.9727	37.4724		16	96.1898	91.1846	106.926
17	37.415	37.4084	24.8148		17	92.5237	224.005	85.5869		17	59.6701	143.499	78.8709			17	33.843	32.3917	36.9321		17	33.343	42.1083	29.8435		17	24.2307	28.4258	23.6755			17	52.8576	56.461	52.6		17	35.7003	37.6642	37.4142		17	97.0864	93.1424	106.46
18	42.8725	46.8662	31.9666		18	141.068	233.883	144.974		18	81.2428	164.602	111.51			18	32.9601	37.0318	37.6655		18	31.1388	41.7465	31.4371		18	25.5154	27.2192	25.5737			18	52.8331	57.7621	52.4032		18	37.6633	37.8618	36.8498		18	99.3994	94.0376	104.109
19	46.3857	56.8023	39.1656		19	207.866	241.527	236.943		19	106.282	184.005	146.45			19	32.6438	38.7713	39.7611		19	35.7471	41.0138	35.9066		19	26.37	28.237	24.3822			19	54.8653	58.7133	53.4428		19	36.8398	37.1354	37.8444		19	103.105	94.1348	109.488
20	50.7939	62.3115	50.3723		20	233.98	261.11	276.812		20	129.064	201.808	175.48			20	36.9652	38.4405	41.1858		20	36.9834	49.709	35.9605		20	26.6574	29.5014	30.8902			20	56.3212	59.7886	54.9377		20	36.6359	36.6853	37.1562		20	109.317	94.8459	103.6
21	54.9223	69.0142	55.8942		21	267.851	282.711	299.213		21	147.977	215.694	196.464			21	39.4906	40.1981	45.8432		21	34.9078	53.418	32.9971		21	27.233	31.5061	27.7105			21	56.9186	60.9273	56.7544		21	37.0205	38.6499	37.7121		21	100.512	98.1968	108.439
22	58.8344	73.8531	61.3168		22	291.844	314.163	310.153		22	163.852	224.303	212.065			22	45.2377	44.8448	45.1403		22	43.2111	57.7874	38.898		22	30.3895	32.6371	29.8263			22	59.1241	62.0977	56.8739		22	38.246	37.3633	38.8054		22	100.394	96.725	108.386
23	63.2615	77.0309	67.0239		23	308.836	341.692	316.097		23	174.907	231.885	223.57			23	42.5508	42.985	46.2828		23	47.6897	58.8839	37.2151		23	30.2348	32.8825	34.0939			23	61.6312	63.2908	57.3469		23	37.5935	38.0749	37.7688		23	105.805	99.3248	104.586
24	67.0318	80.352	71.8356		24	322.982	350.776	354.337		24	184.982	238.965	230.037			24	47.2695	49.8328	51.9689		24	48.0255	58.6716	42.3935		24	32.3187	36.9931	33.2901			24	60.9665	65.8345	58.808		24	37.596	38.3486	37.8249		24	102.511	97.9828	105.033
25	70.1333	81.8376	76.3057		25	318.449	357.309	383.107		25	190.946	248.413	236.949			25	45.7446	45.8745	50.7075		25	46.2628	56.1984	41.1066		25	36.7959	34.3347	31.8724			25	60.9378	66.0429	60.372		25	38.4199	38.3763	37.9859		25	100.434	100.474	106.296
26	73.5299	82.5888	79.6681		26	319.934	355.631	398.318		26	196.825	254.222	243.202			26	44.4272	54.2901	55.8826		26	55.888	64.563	42.8242		26	34.6427	35.6091	34.964			26	63.6592	67.4017	60.8127		26	37.0962	38.7981	37.4952		26	101.173	97.9539	105.937
27	75.6532	82.0067	82.5989		27	319.994	349.556	405.728		27	201.939	256.52	246.1			27	47.6766	57.2955	60.665		27	53.7441	66.7279	37.4048		27	36.4263	35.0263	33.557			27	64.3013	68.4799	62.3561		27	39.2449	39.8251	37.5735		27	108.7	99.3319	108.07
28	77.4583	82.145	84.6167		28	320.638	351.666	410.472		28	204.793	263.767	250.546			28	49.0639	58.6656	73.7011		28	59.1052	69.0834	45.5984		28	40.8111	47.4683	33.0602			28	67.1649	69.1687	63.5639		28	38.9002	39.1255	38.3947		28	112.207	97.9553	106.605
29	78.565	81.2251	85.2024		29	324.331	354.877	416.04		29	207.695	268.759	253.091			29	48.8261	69.3979	59.3979		29	57.6159	76.9036	48.8286		29	39.6668	39.5446	36.9387			29	66.6879	69.9362	63.4359		29	36.9249	40.419	39.2969		29	103.811	101.569	105.571
30	79.6637	80.3762	86.2485		30	325.508	357.95	415.948		30	209.988	273.006	255.592			30	54.3171	58.032	53.9684		30	74.6997	83.0445	55.7099		30	42.6319	43.5393	39.8607			30	68.3129	72.347	66.8237		30	39.319	40.7495	38.2687		30	109.939	104.17	111.697
31	79.9776	80.1051	86.4917		31	325.938	357.865	412.61		31	211.995	281.833	257.169			31	55.348	71.583	74.3869		31	60.0562	79.2419	49.0652		31	40.9293	40.9699	39.7842			31	67.7355	72.6817	67.5904		31	37.6288	39.0381	39.8325		31	106.531	101.573	109.206
32	79.8573	79.3149	86.3864		32	330.212	359.242	414.881		32	213.212	288.432	257.306			32	58.4951	82.6086	67.7691		32	62.4018	88.3739	57.3703		32	46.6289	46.0025	41.1495			32	69.9263	75.2142	68.0321		32	40.2717	40.3078	40.0005		32	109.088	101.155	108.835
33	79.8882	78.4518	86.4342		33	330.063	362.236	414.856		33	214.753	290.867	259.063			33	55.5463	90.823	68.6561		33	66.5928	87.868	58.6442		33	47.8642	51.3875	43.0794			33	71.1405	75.273	68.6005		33	39.6799	41.6543	38.5515		33	104.501	107.358	116.693
34	79.5558	77.8945	85.5037		34	330.672	363.617	410.782		34	214.071	295.149	258.505			34	63.2411	89.7071	83.0492		34	73.0715	84.9411	63.3729		34	49.5809	48.002	50.9832			34	72.9674	77.2856	69.475		34	38.6495	41.3751	41.8549		34	105.77	101.759	113.099
35	79.5327	77.8727	85.4987		35	331.98	365.614	410.045		35	214.881	298.201	259.089			35	63.0605	79.1524	75.5726		35	79.0166	105.264	64.6035		35	48.025	42.2833	48.1525			35	73.6697	77.9607	71.9003		35	39.5156	40.6121	40.8222		35	106.407	103.78	108.928
36	78.9289	76.7706	85.7171		36	334.387	364.62	408.008		36	216.326	298.912	260.417			36	70.3449	76.4025	75.5133		36	84.486	116.059	71.0291		36	52.9371	54.1554	46.8697			36	75.3216	79.6612	71.6082		36	39.825	41.9405	42.235		36	106.366	103.268	110.124
37	78.9894	76.185	85.0963		37	333.724	364.387	406.884		37	215.698	303.432	262.445			37	73.2251	87.2739	96.9089		37	87.4849	121.316	76.0096		37	54.8894	59.4109	54.6883			37	75.4282	80.5258	72.5531		37	39.6583	40.8651	39.1642		37	114.086	103.55	129.731
38	77.9937	75.3768	85.334		38	335.436	364.689	404.915		38	215.454	303.126	261.586			38	73.0458	94.0992	77.2157		38	100.389	104.932	70.2791		38	59.3192	70.9832	52.2193			38	77.7661	82.75	74.3217		38	39.3531	41.7994	40.7968		38	107.419	104.152	113.029
39	77.6242	75.3455	84.5165		39	333.653	364.618	404.14		39	215.816	305.331	261.677			39	75.123	105.431	86.2208		39	96.6901	123.473	85.4298		39	58.1163	64.5156	61.826			39	78.5537	83.9303	75.6008		39	39.758	41.7742	39.5408		39	108.61	111.26	112.295
40	78.0805	74.8295	84.4642		40	335.254	366.323	402.146		40	216.416	309.055	263.186			40	74.5689	100.853	80.4616		40	93.8563	125.089	84.3568		40	63.2593	59.2465	60.0529			40	79.9207	85.4404	76.0666		40	40.8061	41.8378	42.2274		40	109.629	103.248	117.275
41	77.4289	74.2308	84.0545		41	334.775	366.226	402.659		41	217.129	309.392	261.807			41	85.5516	105.909	92.1044		41	96.5829	122.797	81.6038		41	70.2516	58.645	61.2842			41	79.6896	85.2593	77.8612		41	41.3489	41.9662	40.9394		41	109.713	106.429	113.882
42	77.1783	73.8985	84.738		42	334.53	366.332	401.108		42	217.24	312.22	262.074			42	90.9066	109.115	92.7604		42	102.875	143.857	83.8766		42	77.5672	67.4065	64.3739			42	82.4396	86.9865	80.0598		42	40.5196	41.0745	41.438		42	110.25	104.092	116.471
43	76.7788	73.9679	84.1978		43	334.788	367.01	399.634		43	217	310.251	262.147			43	99.83	117.392	105.957		43	107.913	134.147	91.5923		43	84.7198	72.0293	74.6169			43	83.3657	88.7999	80.5497		43	41.9126	41.1226	40.7361		43	126.55	106.766	120.099
44	77.2886	73.6715	83.8602		44	336.736	368.498	398.484		44	216.161	312.169	262.768			44	96.5055	110.302	102.938		44	108.183	135.571	97.8444		44	77.7316	87.9574	75.8059			44	83.8166	90.7433	81.1807		44	40.0417	42.2709	40.7731		44	108.731	104.499	111.279
45	76.4531	73.3379	83.5718		45	335.009	369.278	399.139		45	216.816	313.539	263.276			45	101.172	128.061	102.893		45	117.815	144.288	101.85		45	74.7019	68.2395	71.7788			45	86.4625	90.8366	81.0656		45	41.4682	41.8416	41.9751		45	110.235	101.067	114.334
46	76.3214	73.0693	83.9285		46	336.388	369.339	399.962		46	216.499	313.09	263.325			46	99.7298	130.604	105.421		46	119.861	147.037	100.527		46	89.6304	77.8474	72.3638			46	88.076	92.7945	83.0512		46	41.5121	42.5584	43.0923		46	110.328	102.379	116.005
47	76.6662	72.8352	83.9127		47	335.118	369.789	397.62		47	217.38	314.749	263.09			47	112.355	131.897	105.393		47	139.045	165.439	103.328		47	84.8714	85.015	72.1892			47	88.2553	91.9493	84.3811		47	40.5132	43.0805	41.1836		47	114.343	107.696	110.385
48	76.4818	72.7437	83.5619		48	336.377	370.372	397.471		48	217.727	314.729	263.257			48	102.363	133.805	106.561		48	139.916	167.981	115.533		48	92.1021	89.5312	77.911			48	90.2476	94.7974	84.7189		48	41.9992	42.888	41.4701		48	115.946	106.161	128.3
49	76.232	72.7614	83.4782		49	334.662	370.105	399.79		49	216.768	316.128	262.348			49	106.701	128.94	111.461		49	127.727	159.519	110.298		49	90.6007	92.0207	77.3297			49	91.3603	97.3926	85.8465		49	41.2966	43.0346	42.7364		49	112.133	110.37	123.34
50	76.0694	72.4455	83.454		50	336.834	370.015	396.713		50	217.079	315.832	263.018			50	109.677	139.668	131.805		50	141.953	193.657	130.486		50	98.9973	93.0573	94.5616			50	91.0981	97.5574	85.8891		50	40.3186	42.0972	47.9197		50	114.218	105.561	111.725
																51	114.438	133.052	117.816		51	154.999	188.502	121.534		51	97.0095	93.362	87.0454			51	92.4111	100.999	86.8387		51	40.3245	42.9606	42.7931		51	113.625	102.327	116.832
																52	117.819	145.199	116.244		52	186.565	181.417	149.565		52	105.013	94.4943	82.6029			52	94.8235	99.0459	88.7158		52	41.1745	42.719	40.8252		52	111.968	104.51	111.13
																53	120.676	151.016	118.724		53	166.106	191.413	153.323		53	99.8541	97.4943	99.5845			53	95.166	100.626	87.8106		53	39.0284	41.0176	43.142		53	112.457	100.767	108.722
																54	135.121	143.312	141.769		54	170.048	211.553	145.291		54	118.994	93.8406	92.7689			54	97.173	101.758	89.7835		54	39.6607	43.7143	42.7654		54	112.389	103.628	111.377
																55	107.723	147.99	128.561		55	156.496	207.138	156.269		55	111.174	90.3131	96.6767			55	98.6012	104.312	90.8308		55	39.8756	42.4025	41.9382		55	115.196	101.377	107.197
																56	126.56	151.709	133.488		56	188.59	236.902	156.96		56	120.192	107.895	97.3954			56	98.2619	106.769	92.5085		56	39.5046	41.1413	42.6675		56	108.602	104.094	118.319
																57	138.03	152.078	140.401		57	187.255	215.047	134.201		57	131.386	123.735	95.5002			57	100.334	106.424	93.0993		57	39.5877	40.2889	41.627		57	116.646	104.745	107.474
																58	128.568	154.746	148.43		58	189.956	218.501	154.21		58	120.127	125.44	105.033			58	100.424	108.1	93.4835		58	38.8965	42.235	47.9961		58	109.804	101.181	115.419
																59	132.683	157.522	131.879		59	208.106	225.39	153.62		59	133.06	119.042	106.113			59	99.5091	105.539	91.3082		59	37.5346	41.498	43.6467		59	108.096	102.211	106.96
																60	138.999	164.52	129.085		60	194.106	230.296	178.763		60	130.678	113.492	115.77			60	101.808	107.774	90.4816		60	37.6998	40.321	69.2913		60	107.754	103.377	104.738
																61	141.909	154.715	140.39		61	191.932	224.532	174.932		61	139.414	121.783	107.966			61	103.146	111.831	94.1418		61	36.0235	43.0215	42.5319		61	107.677	97.8435	103.374
																62	137.479	147.449	150.841		62	209.741	228.765	172.18		62	134.384	144.421	117.026			62	101.515	112.995	92.7064		62	36.943	41.5968	43.86		62	107.548	93.6191	100.893
																63	149.397	155.867	152.54		63	232.155	236.038	199.025		63	142.262	128.37	123.678			63	101.941	115.499	93.3106		63	37.1151	41.3965	44.3163		63	111.027	93.4623	103.615
																64	147.078	156.275	139.344		64	214.861	239.536	197.081		64	138.967	128.653	115.278			64	104.175	119.939	92.344		64	36.771	38.708	43.2773		64	106.986	91.5992	106.9
																65	162.893	158.404	148.651		65	208.39	242.322	203.519		65	147.252	121.003	123.466			65	102.634	124.585	99.0713		65	37.0604	39.4257	43.2806		65	106.818	93.3382	103.039
																66	157.325	157.079	151.836		66	215.655	250.657	187.453		66	151.539	141.085	123.175			66	102.812	121.921	96.6955		66	37.2224	38.5733	45.6525		66	101.967	91.8855	101.679
																67	153.47	156.089	150.629		67	225.181	258.008	204.327		67	143.609	134.197	130.217			67	101.282	124.274	94.7929		67	35.5403	40.7811	46.5599		67	99.8176	90.636	93.8694
																68	162.85	158.218	154.078		68	239.951	255.393	219.659		68	155.27	137.198	130.817			68	103.842	128.305	96.497		68	36.6647	38.3159	51.0825		68	102.276	87.9011	95.9366
																69	164.104	156.018	148.547		69	254.465	268.726	184.525		69	159.804	144.054	129.789			69	111.584	155.865	99.018		69	35.0213	37.5988	44.9748		69	95.0208	84.2623	93.8847
																70	156.535	158.393	160.621		70	239.489	268.579	228.998		70	156.07	138.708	134.095			70	111.221	128.066	99.344		70	35.3388	37.5589	44.5231		70	95.3657	82.0715	94.7958
																71	145.709	159.427	155.656		71	251.32	258.813	252.443		71	152.434	145.76	138.376			71	110.545	130.045	97.4735		71	33.7409	38.7049	44.0613		71	112.389	79.6751	91.3967
																72	151.518	154.941	155.109		72	236.512	261.798	215.554		72	158.852	146.796	132.159			72	114.223	129.832	105.409		72	33.4764	38.8478	45.2446		72	91.5029	78.4583	90.6554
																73	157.468	153.563	149.576		73	242.529	264.894	191.354		73	163.369	146.839	136.746			73	113.569	131.361	106.577		73	32.6523	37.8404	44.4657		73	89.7175	76.3335	94.4697
																74	167.632	156.633	148.764		74	269.211	264.054	235.973		74	161.651	142.08	133.393			74	108.437	138.799	101.323		74	33.5414	37.708	41.4537		74	89.6568	75.346	94.166
																75	164.836	154.864	152.581		75	250.077	269.407	222.853		75	161.676	151.067	136.318			75	107.747	143.195	99.5363		75	32.2273	37.6747	43.3861		75	84.5367	73.8646	85.2887
																76	157.05	152.942	149.06		76	255.484	263.122	239.647		76	160.531	156.227	141.866			76	108.987	140.587	96.1126		76	32.6061	39.2922	41.5286		76	85.2247	74.4168	84.9365
																77	160.941	154.621	153.932		77	255.346	263.393	245.239		77	162.032	160.155	139.214			77	111.249	138.644	97.6002		77	32.4489	41.6478	48.7049		77	85.1999	73.6334	87.7508
																78	159.302	158.3	157.198		78	258.578	258.476	229.939		78	161.89	146.973	140.94			78	108.464	149.179	99.3583		78	32.4244	44.6831	57.5348		78	83.6833	72.4795	84.4306
																79	165.741	154.564	148.616		79	262.782	261.612	233.882		79	163.943	145.176	134.747			79	107.674	148.596	97.5945		79	30.9187	46.3821	51.6712		79	82.543	73.1101	80.551
																80	163.625	156.064	156.484		80	272.663	260.768	225.796		80	164.28	149.739	140.776			80	105.316	163.175	107.007		80	31.8878	45.1702	49.0506		80	85.3853	73.5397	82.1671
																81	164.651	153.773	154.024		81	253.632	262.987	241.239		81	163.838	150.691	140.063			81	100.917	167.462	103.625		81	31.1502	47.2818	51.6597		81	82.8846	74.2219	79.6346
																82	165.237	152.261	151.242		82	263.511	262.033	258.712		82	158.501	155.19	144.497			82	101.491	159.593	103.584		82	30.5513	47.224	51.1342		82	82.6375	72.7779	79.6785
																83	162.476	154.352	152.809		83	259.506	263.027	233.294		83	164.537	141.661	140.83			83	106.92	162.333	100.372		83	30.1974	63.7289	53.5537		83	87.5153	72.6225	79.685
																84	154.714	154.895	153.49		84	254.563	262.582	246.954		84	162.241	149.578	141.868			84	109.783	162.799	101.165		84	30.8756	53.3664	61.4416		84	103.747	73.4467	76.8938
																85	161.716	152.784	153.92		85	259.018	267.415	237.689		85	162.216	149.017	143.008			85	109.47	152.859	106.772		85	30.3767	54.374	54.4815		85	83.6777	73.7226	78.0709
																86	160.716	156.921	157.474		86	262.275	261.517	248.741		86	160.031	154.02	142.122			86	118.215	170.263	107.823		86	31.7568	57.9275	59.4212		86	83.7947	74.1554	77.3566
																87	161.154	154.225	156.523		87	261.775	264.533	241.548		87	165.013	141.567	140.19			87	113.661	169.021	103.48		87	30.3647	57.6819	58.5924		87	83.5959	74.6135	78.5455
																88	159.724	154.61	150.664		88	259.176	259.008	240.956		88	167.545	145.917	144.169			88	112.89	164.014	101.15		88	30.4742	55.6935	60.7749		88	84.6993	75.353	78.9931
																89	161.708	153.87	151.746		89	256.55	265.659	245.763		89	160.305	147.066	141.393			89	114.058	217.926	93.7738		89	31.8716	60.3136	62.368		89	84.9693	77.4249	77.9997
																90	158.204	153.714	153.604		90	256.33	266.036	243.554		90	164.128	151.944	143.417			90	110.034	171.855	96.597		90	33.4095	63.6029	61.7865		90	87.9084	77.2922	78.8237
																91	161.945	152.824	151.214		91	255.124	257.364	242.026		91	162.349	149.032	143.018			91	112.861	172.323	86.6204		91	33.1874	63.1227	57.9765		91	88.0393	77.8696	79.1613
																92	159.984	155.64	152.49		92	260.752	267.562	245.293		92	163.652	149.796	142.771			92	111.765	215.839	81.7854		92	33.26	62.8387	58.9175		92	88.2807	78.33	80.5032
																93	157.227	153.612	151.753		93	253.328	266.005	251.055		93	161.478	147.961	140.189			93	112.829	193.782	89.5383		93	33.8924	70.4045	57.7305		93	91.1832	80.465	80.779
																94	161.164	154.441	151.914		94	260.228	262.368	243.468		94	161.127	146.265	137.521			94	114.133	215.281	97.9039		94	34.849	71.9611	67.7143		94	92.8614	81.8655	82.9094
																95	161.169	152.103	149.805		95	259.05	264.817	239.109		95	163.4	143.463	137.917			95	112.494	220.683	102.092		95	34.6788	70.3389	71.2886		95	95.767	83.1349	84.8598
																96	159.603	154.498	148.25		96	257.162	267.934	248.859		96	163.262	146.417	138.211			96	112.469	247.601	98.6741		96	37.411	72.2481	64.1584		96	97.4766	84.8342	87.2273
																97	160.462	152.741	148.848		97	263.526	266.717	243.764		97	162.706	148.873	139.631			97	113.427	220.592	96.1858		97	39.047	73.3107	64.7662		97	97.6745	86.7317	88.7919
																98	159.736	152.236	154.072		98	254.97	272.461	236.361		98	161.888	147.782	138.57			98	113.475	218.404	123.787		98	39.5767	79.9652	68.0562		98	100.013	87.6398	87.1789
																99	163.917	152.46	154.435		99	261.052	261.188	241.671		99	163.44	150.908	139.941			99	114.669	218.569	103.94		99	40.241	80.1711	82.1566		99	103.186	89.4871	89.706
																100	162.641	155.494	154.635		100	260.483	262.131	237.972		100	164.256	146.749	139.503			100	117.242	252.737	133.452		100	41.3833	79.9375	96.9663		100	106.663	95.399	92.8248
																																101	116.522	237.598	143.08		101	42.5011	83.2632	81.5844		101	112.89	95.4588	93.9262
																																102	123.39	228.816	156.401		102	42.3975	84.9871	108.498		102	108.51	101.224	94.5667
																																103	125.598	252.515	170.795		103	44.579	86.0775	135.609		103	112.206	101.225	96.9631
																																104	126.545	254.615	186.157		104	46.7596	87.7318	86.4013		104	117.938	102.866	98.5147
																																105	128.551	264.804	243.249		105	48.0425	91.502	99.0746		105	120.42	106.603	102.389
																																106	132.594	297.791	233.291		106	49.6449	93.3756	101.784		106	123.595	107.612	101.775
																																107	134.977	287.95	260.614		107	51.1666	93.0117	110.961		107	125.828	110.591	106.663
																																108	134.837	275.082	278.313		108	50.7233	98.5825	118.464		108	130.863	112.153	109.118
																																109	138.218	314.63	293.57		109	53.7503	106.822	128.697		109	134.95	115.489	118.632
																																110	145.055	310.083	300.743		110	54.3551	99.4	146.023		110	134.817	119.013	120.228
																																111	146.175	354.65	320.829		111	54.8621	94.9524	137.828		111	138.629	120.078	124.233
																																112	148.905	347.133	335.693		112	58.1381	97.8624	141.29		112	141.146	124.334	125.817
																																113	154.067	359.569	363.254		113	57.8521	108.52	144.253		113	144.423	128.065	130.385
																																114	156.071	411.124	355.702		114	59.8929	99.3032	153.142		114	151.429	129.229	136.003
																																115	155.617	479.549	368.909		115	58.727	98.173	156.283		115	155.542	135.208	139.371
																																116	162.234	518.868	373.747		116	59.5791	100.822	158.099		116	157.726	136.157	140.712
																																117	164.742	508.713	370.357		117	63.4295	102.331	167.767		117	161.65	139.737	148.298
																																118	171.1	487.211	387.272		118	64.495	101.853	161.975		118	165.298	144.893	148.207
																																119	175.428	532.408	397.608		119	65.3906	105.215	124.402		119	173.664	146.931	153.687
																																120	182.129	500.926	396.259		120	66.8354	104.8	131.872		120	178.487	151.85	155.618
																																121	186.116	538.64	405.938		121	67.9506	106.642	157.526		121	183.968	154.875	158.428
																																122	193.694	530.027	403.985		122	69.404	106.617	125.125		122	192.482	158.198	163.185
																																123	201.432	566.847	409.953		123	71.1016	108.554	126.088		123	200.946	161.689	168.596
																																124	207.61	620.221	415.684		124	74.6263	109.131	133.049		124	205.632	164.781	171.808
																																125	207.161	633.317	419.975		125	75.3851	110.656	137.464		125	205.943	167.039	175.314
																																126	213.403	642.721	426.643		126	75.7365	111.572	137.997		126	210.525	171.721	179.163
																																127	221.238	641.595	431.849		127	76.475	109.158	142.226		127	216.09	177.604	184.834
																																128	224.797	621.337	437.889		128	77.5224	111.808	146.974		128	219.778	180.739	192.329
																																129	234.754	644.176	437.043		129	79.0178	112.688	156.291		129	227.706	184.237	190.814
																																130	235.437	640.75	444.885		130	81.3097	112.842	148.925		130	231.396	189.21	195.204
																																131	240.259	660.053	446.671		131	80.7272	113.416	150.786		131	234.944	191.093	200.519
																																132	255.362	665.309	446.081		132	79.6543	116.28	150.487		132	236.093	195.097	202.288
																																133	258.32	661.936	452.16		133	83.2262	116.153	154.071		133	235.757	200.009	204.726
																																134	260.493	663.016	457.945		134	86.3517	115.237	155.716		134	242.869	207.49	212.097
																																135	267.075	653.634	459.764		135	88.1827	115.647	160.974		135	245.704	205.235	213.805
																																136	272.621	668.533	466.539		136	85.2933	115.761	162.387		136	250.146	208.936	220.101
																																137	278.158	668.464	468.261		137	89.0687	119	162.2		137	252.877	213.493	220.679
																																138	283.26	668.254	467.421		138	89.9274	117.657	165.242		138	258.639	217.284	225.803
																																139	293.79	670.939	472.582		139	88.0271	118.545	165.23		139	260.813	221.127	229.977
																																140	295.417	680.323	479.456		140	91.3495	118.879	172.274		140	261.722	219.994	232.123
																																141	295.062	683.333	473.904		141	92.5405	116.57	173.327		141	262.454	225.222	240.803
																																142	305.804	682.696	479.816		142	93.3493	118.884	179.65		142	265.891	224.359	243.78
																																143	312.349	690.54	474.14		143	93.2431	117.642	172.669		143	268.273	230.751	247.104
																																144	316.191	682.604	478.068		144	91.9927	120.186	177.44		144	271.683	230.288	250.318
																																145	324.186	690.112	473.622		145	91.0929	118.387	177.045		145	271.485	234.606	255.134
																																146	341.755	688.567	483.725		146	91.9976	122.506	179.767		146	275.023	237.892	257.627
																																147	348.753	690.05	487.903		147	93.8227	120.934	178.607		147	276.305	241.756	260.282
																																148	360.013	690.093	494.497		148	93.2619	122.596	179.635		148	279.358	249.96	264.071
																																149	368.8	699.338	490.656		149	93.6569	122.579	181.632		149	279.244	253.525	267.697
																																150	368.245	692.122	495.499		150	95.4378	119.132	179.787		150	279.495	248.778	267.215
																																151	374.442	696.08	491.661		151	96.8547	123.626	181.511		151	286.404	249.677	270.723
																																152	379.875	695.534	499.053		152	96.1225	122.433	181.936		152	286.363	250.551	270.196
																																153	383.854	701.174	501.829		153	96.6663	121.558	182.167		153	287.573	253.542	274.999
																																154	394.599	695.743	504.339		154	98.0186	120.501	186.176		154	286.238	255.438	278.327
																																155	394.707	699.265	506.367		155	95.808	121.857	181.306		155	290.178	254.498	279.997
																																156	400.514	701.585	520.958		156	95.6384	120.33	181.64		156	291.827	254.31	283.149
																																157	407.089	703.768	516.323		157	97.4501	123.924	180.632		157	292.268	258.931	283.04
																																158	410.454	705.608	516.838		158	99.5259	124.131	179.906		158	297.212	259.864	286.598
																																159	419.334	705.047	520.027		159	100.08	120.18	183.921		159	300.323	261.655	287.377
																																160	421.857	702.724	523.722		160	98.4199	121.264	185.32		160	300.646	265.221	289.66
																																161	427.131	702.718	521.141		161	98.9335	122.589	183.517		161	300.698	264.342	293.846
																																162	428.944	699.188	528.574		162	100.229	122.311	185.352		162	303.963	266.334	295.101
																																163	435.495	701.251	527.518		163	98.1314	123.323	185.762		163	308.729	269.955	296.816
																																164	436.917	702.314	535.443		164	100.013	121.523	186.451		164	298.79	274.776	300.759
																																165	440.67	700.874	528.814		165	100.286	123.401	187.358		165	307.538	279.34	299.985
																																166	443.328	705.049	533.019		166	99.2043	122.971	187.731		166	310.466	280.254	299.168
																																167	452.561	706.68	538.387		167	101.79	122.845	188.894		167	314.447	282.424	304.34
																																168	454.436	716.42	538.926		168	101.184	123.436	188.229		168	311.76	282.661	306.473
																																169	456.705	717.691	539.16		169	101.033	124.667	188.658		169	307.943	285.531	309.927
																																170	461.493	721.808	535.925		170	99.9721	124.706	190.507		170	308.034	283.702	310.049
																																171	463.222	719.55	537.372		171	101.715	122.995	191.353		171	312.033	284.682	310.735
																																172	466.339	717.782	529.413		172	99.3087	124.441	194.667		172	315.367	287.725	311.911
																																173	471.159	715.9	540.998		173	98.8809	124.458	192.799		173	315.828	292.886	313.722
																																174	475.382	718.803	539.989		174	102.468	125.714	191.677		174	315.745	290.851	316.793
																																175	476.349	717.932	542.571		175	103.75	124.313	192.199		175	320.311	292.727	317.333
																																176	479.053	716.046	548.007		176	102.013	127.603	192.805		176	318.42	295.562	318.123
																																177	477.562	714.614	545.604		177	100.535	126.367	193.752		177	315.635	297.505	319.293
																																178	482.12	713.202	543.92		178	100.933	124.885	193.304		178	320.29	298.145	318.807
																																179	482.554	718.488	549.132		179	102.297	124.606	191.821		179	321.178	300.165	323.883
																																180	484.007	713.301	550.853		180	103.278	126.691	193.041		180	322.483	301.357	323.866
																																181	485.64	712.324	548.953		181	103.141	127.316	192.299		181	322.571	301.274	322.272
																																182	485.426	707.842	546.075		182	104.543	126.775	193.779		182	323.014	302.649	324.913
																																183	482.56	712.693	551.19		183	103.159	126.62	192.692		183	320.834	304.388	327.558
																																184	484.911	712.004	549.261		184	103.801	126.481	195.941		184	324.676	307.74	326.055
																																185	490.675	711.456	549.602		185	103.012	127.526	194.245		185	325.033	303.638	323.816
																																186	490.973	710.729	553.768		186	104.69	127.533	195.378		186	327.45	305.618	333.102
																																187	491.707	712.363	552.885		187	103.279	125.952	196.009		187	328.229	305.33	333.307
																																188	492.523	712.79	555.933		188	103.651	126.413	197.233		188	328.003	309.142	329.873
																																189	493.235	714.779	554.914		189	105.128	129.653	198.03		189	329.967	310.096	335.338
																																190	496.299	714.969	561.569		190	105.591	127.645	196.728		190	330.783	309.512	336.241
																																191	493.739	711.315	560.979		191	105.313	126.311	195.61		191	329.315	310.623	333.288
																																192	499.11	716.182	565.619		192	103.112	128.246	194.342		192	332.33	312.101	336.625
																																193	499.718	714.426	566.28		193	105.177	131.027	193.821		193	330.329	313.035	334.4
																																194	502.042	714.86	556.938		194	104.416	128.839	194.501		194	333.74	314.152	336.461
																																195	501.266	712.421	564.787		195	105.945	128.792	194.413		195	332.298	314.426	340.232
																																196	501.745	714.434	565.654		196	105.565	129.298	196.45		196	332.942	318.245	337.769
																																197	502.976	714.816	565.685		197	104.696	128.948	196.61		197	334.69	316.436	342.359
																																198	504.3	716.29	558.716		198	107.595	131.027	199.744		198	336.734	316.1	344.287
																																199	505.333	715.597	565.009		199	106.37	132.42	196.958		199	335.577	317.404	342.608
																																200	505.055	713.215	575.643		200	105.973	131.803	196.845		200	332.665	317.979	344.306
																																201	508.134	717.573	578.173		201	108.048	131.553	199.766		201	333.568	317.22	344.564
																																202	507.615	715.751	574.466		202	104.935	131.809	199.173		202	336.427	317.845	348.08
																																203	505.954	714.603	577.909		203	106.373	131.243	198.611		203	336.063	323.191	349.374
																																204	508.836	718.345	574.092		204	104.676	131.578	197.486		204	340.151	321.575	350.002
																																205	509.476	720.511	577.236		205	106.774	133.475	200.643		205	340.083	321.259	349.347
																																206	510.325	717.246	574.937		206	104.821	131.296	202.45		206	340.043	321.596	350.196
																																207	510.718	718.849	578.429		207	107.621	133.843	199.51		207	338.74	321.718	353.986
																																208	512.65	718.096	581.246		208	108.379	133.403	197.753		208	337.827	321.727	357.662
																																209	515.508	717.981	576.492		209	104.173	134.115	202.368		209	340.086	324.047	354.613
																																210	511.189	720.094	580.183		210	105.848	135.063	200.952		210	343.555	326.538	353.405
																																211	508.762	716.078	579.653		211	106.303	131.861	203.427		211	341.714	326.243	355.042
																																212	512.29	717.769	579.19		212	108.422	132.869	202.718		212	341.888	326.002	357.486
																																213	513.731	719.385	582.05		213	107.221	134.807	203.212		213	341.421	326.15	355.903
																																214	513.444	718.336	578.894		214	106.282	133.532	202.306		214	343.235	327.301	354.217
																																215	512.263	719.166	579.094		215	108.266	131.511	204.591		215	344.899	328.2	359.421
																																216	514.491	719.928	582.887		216	109.044	134.21	202.104		216	342.422	329.601	361.335
																																217	514.239	716.807	578.451		217	108.334	134.627	207.517		217	344.792	327.741	361.166
																																218	514.666	715.149	582.144		218	108.253	134.905	204.64		218	344.331	329.706	359.43
																																219	515.987	715.429	580.852		219	110.369	132.836	205.243		219	342.484	331.465	362.567
																																220	517.019	715.725	579.227		220	109.716	134.782	204.665		220	342.874	329.542	361.211
																																221	517.784	713.73	580.958		221	108.214	136.126	206.063		221	340.305	334.098	360.867
																																222	516.12	715.424	579.632		222	109.193	136.035	208.465		222	344.308	331.304	361.443
																																223	516.872	715.57	579.791		223	109.994	134.551	207.035		223	345.621	330.144	361.035
																																224	515.041	715.67	578.064		224	110.732	137.028	206.124		224	345.109	330.396	360.344
																																225	516.956	714.328	580.628		225	110.186	135.096	205.784		225	344.485	335.744	367.832
																																226	517.081	718.621	583.461		226	109.474	135.675	207.564		226	346.783	331.217	366.143
																																227	518.495	716.055	581.401		227	110.423	135.186	208.513		227	345.949	335.446	365.792
																																228	519.595	717.185	582.349		228	108.39	137.691	207.958		228	348.075	333.08	368.926
																																229	517.542	715.67	582.501		229	109.252	137.423	208.176		229	347.607	337.279	366.537
																																230	519.112	715.21	580.331		230	108.84	137.248	210.291		230	341.899	332.914	368.373
																																231	518.641	716.66	582.146		231	108.965	137.132	211.588		231	349.007	333.858	367.443
																																232	521.239	716.625	582.963		232	108.455	135.631	208.271		232	344.438	337.071	368.161
																																233	520.583	716.515	582.333		233	109.391	139.014	209.344		233	349.141	336.384	369.47
																																234	520.799	716.001	582.159		234	108.837	136.65	208.954		234	350.748	332.989	368.875
																																235	520.759	716.727	580.861		235	112.694	137.972	209.471		235	350.438	336.933	370.617
																																236	522.206	716.245	581.068		236	111.902	138.466	209.93		236	348.838	335.953	374.978
																																237	520.759	719.742	583.415		237	112.9	139.581	209.982		237	350.769	342.261	374.518
																																238	522.117	714.8	582.073		238	109.49	138.046	210.296		238	348.547	341.854	373.466
																																239	521.365	717.909	581.302		239	111.237	138.719	211.624		239	348.95	340.988	374.402
																																240	522.8	715.612	582.875		240	111.871	139.432	211.651		240	347.1	341.032	372.786
																																241	522.001	717.635	583.593		241	111.547	139.038	210.569		241	352.311	340.615	376.094
																																242	521.752	716.137	580.809		242	111.959	139.052	212.917		242	350.109	342.362	374.742
																																243	523.049	715.611	582.513		243	112.447	139.88	212.416		243	357.277	342.138	377.689
																																244	521.139	715.947	580.759		244	109.393	139.918	211.749		244	351.038	342.35	372.718
																																245	523.145	717.643	580.808		245	110.768	140.616	210.319		245	355.164	343.869	379.597
																																246	522.322	716.199	581.461		246	112.486	139.448	213.883		246	355.621	343.47	380.853
																																247	523.243	720.253	580.364		247	112.491	138.156	212.322		247	356.466	343.869	375.214
																																248	522.132	717.508	580.673		248	114.551	140.142	214.742		248	352.762	347.802	379.866
																																249	523.612	716.471	581.924		249	112.297	139.991	215.267		249	356.566	344.397	381.717
																																250	523.246	716.197	582.566		250	113.381	140.62	213.446		250	358.681	347.409	378.635
